# Supplementary material for: Guanidine–Curcumin Complex-Loaded Amine-Functionalised Hollow Mesoporous Silica Nanoparticles for Breast Cancer Therapy
Source: MDPI journal article supplement (doi:10.3390/cancers14143490), 2022-07-18
Supplement: s1 [file s1]

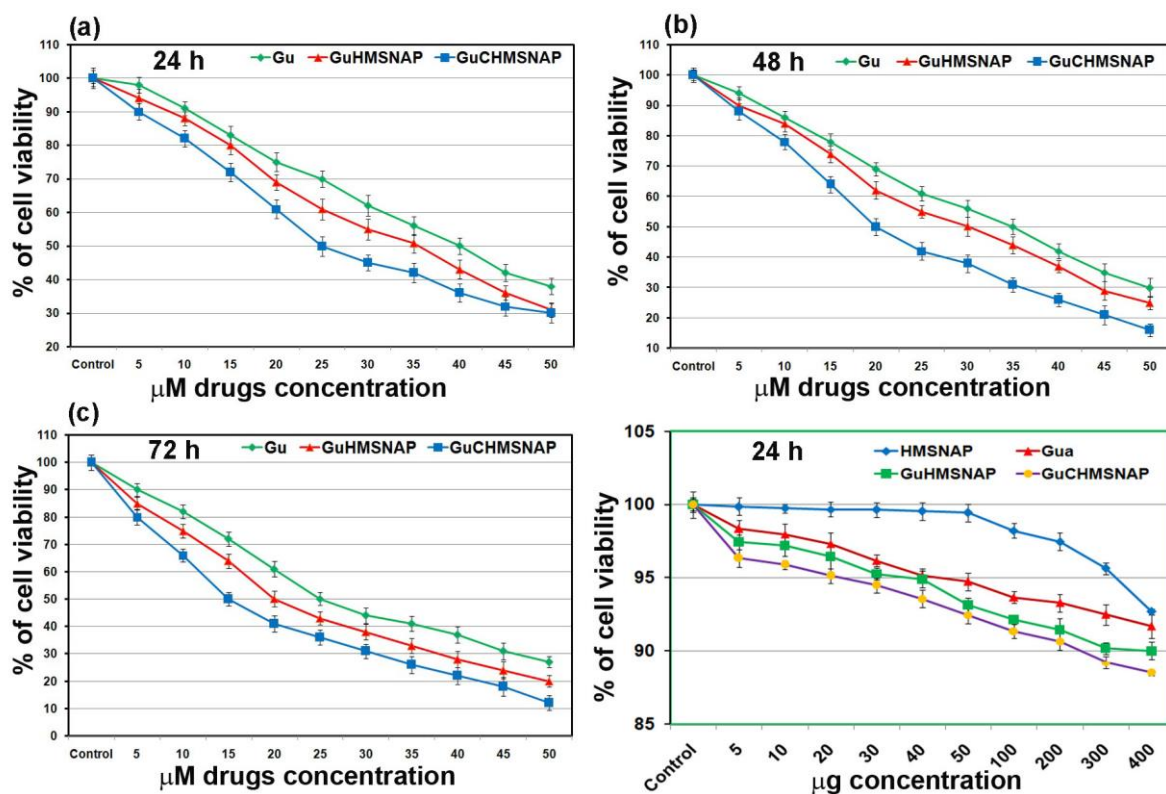

**Figure S1.** The cell viability assessment of different concentrations of guanidine alone, guanidine-loaded HMSNAP and guanidine curcumin complex-loaded HMSNAP-treated HEK 293 cells. Dose and time-dependent manner of cell viability testing with free guanidine, Gu-HMSNAP, and GuC-HMSNAP-treated MCF-7 cells at 24 h (a), 48 h (b), 72 h (c) and HMSNAP, guanidine alone, guanidine-loaded HMSNAP and guanidine curcumin complex-loaded HMSNAP at 24 h (d). Results of MTT are expressed as a percentage related to untreated cells and are set as 100%.
