# Supplementary material for: Guanidine–Curcumin Complex-Loaded Amine-Functionalised Hollow Mesoporous Silica Nanoparticles for Breast Cancer Therapy
Source: Cancers (Basel). 2022 Jul 18;14(14):3490. doi: 10.3390/cancers14143490 (PMC9323383; doi:10.3390/cancers14143490)
Supplement: Supplementary file 1 [file cancers-14-03490-s001.zip › cancers-1796436-Supplementary Table S1.xls]

## Sheet: Sheet1
			GuHMSN	GuHMSN + C	GuHMSN	GuHMSN + C	GuHMSN	GuHMSN + C
			3	3	6	6	7.4	7.4						Mean	SD	N
	6	360	5.93	8.63	7.8	11.04	10.68	12.97		5.93	4.95	6.42		5.76667	0.748487	3
			4.95	6.5	7.25	9.54	10.36	11.95		6.93	7.65	11.12		8.56667	2.24036	3
			6.42	6.84	6.92	10.11	10.31	12.43		16.93	17.85	19.72		18.1667	1.4217	3
	12	720	6.93	7.12	8.85	13.58	15.77	17.77		18.03	20.85	22.72		20.5333	2.36098	3
			7.65	6.13	9.65	12.93	14.84	16.49		21.63	22.9	24.82		23.1167	1.606	3
			7.12	6.11	9.91	13.85	15.42	17.43		24.48	26.95	27.82		26.4167	1.7327	3
	18	1080	16.93	19.27	21.65	27.54	26.72	30.25		34.85	36.77	37.73		36.45	1.46642	3
			15.85	17.63	23.93	26.67	25.69	29.29		42.25	44.42	46.63		44.4333	2.19003	3
			16.72	18.78	21.78	28.15	27.54	30.13		50.35	51.62	53.53		51.8333	1.6007	3
	24	1440	21.03	20.63	28.68	36.24	32.51	38.65		63.93	65.35	66.76		65.3467	1.415	3
			18.85	19.21	29.93	34.91	32.19	36.46
			19.72	21.52	30.08	35.55	32.66	37.57		8.63	9.5	12.84		10.3233	2.22248	3
	30	1800	22.63	26.77	34.69	40.54	39.58	45.36		11.12	13.13	15.11		13.12	1.99502	3
			19.9	27.24	32.37	39.51	39.29	43.56		19.27	22.63	24.78		22.2267	2.77705	3
			21.82	27.35	33.3	39.23	39.75	44.77		20.63	23.21	25.52		23.12	2.44624	3
	36	2160	28.48	32.24	38.59	47.55	45.48	57.76		26.77	28.24	30.35		28.4533	1.79951	3
			24.95	30.71	37.19	45.92	44.31	54.36		32.24	34.71	35.32		34.09	1.63092	3
			26.82	31.32	37.84	46.81	46.23	56.57		33.84	36.81	38.52		36.39	2.3681	3
	42	2520	34.85	33.84	46.32	56.15	55.79	67.57		40.12	42.91	44.25		42.4267	2.107	3
			31.77	32.81	47.39	53.81	55.69	66.86		48.57	51.66	54.77		51.6667	3.10001	3
			33.73	32.52	46.64	54.32	56.88	67.59		58.27	60.06	62.97		60.4333	2.37214	3
	48	2880	46.25	40.12	45.61	69.85	73.19	75.58
			44.42	39.91	45.3	66.42	71.71	74.73		7.8	9.25	11.92		9.65667	2.08989	3
			46.63	40.25	46.7	67.35	72.78	75.68		8.85	10.65	13.91		11.1367	2.56487	3
	54	3240	50.35	48.57	55.17	73.65	78.49	82.33		21.65	24.93	26.78		24.4533	2.59801	3
			51.62	46.66	54	72.12	79.67	81.35		28.68	30.93	33.08		30.8967	2.20019	3
			53.53	48.77	56.11	73.25	78.84	82.38		34.69	36.37	39.3		36.7867	2.33307	3
	60	3600	63.93	58.27	70.72	83.05	86.93	89.6		38.59	40.19	43.84		40.8733	2.69088	3
			65.35	56.06	69.31	80.82	87.12	88.25		46.32	50.39	52.64		49.7833	3.20338	3
			66.76	56.97	70.15	82.15	87.05	89.18		52.61	55.3	57.7		55.2033	2.54638	3
										55.17	58	61.11		58.0933	2.9711	3
			1	2	3	4	5	6		70.72	74.31	76.15		73.7267	2.7616	3
										11.04	14.54	15.11		13.5633	2.20378	3
										13.58	16.93	17.85		16.12	2.24729	3
										27.54	30.67	32.15		30.12	2.3537	3
										36.24	38.91	39.55		38.2333	1.75569	3
										40.54	41.51	43.23		41.76	1.36231	3
										47.55	49.92	52.81		50.0933	2.63428	3
										56.15	57.81	59.32		57.76	1.58559	3
										69.85	71.42	73.35		71.54	1.75308	3
										73.65	76.12	77.25		75.6733	1.8411	3
										83.05	85.82	86.15		85.0067	1.70254	3
										10.68	11.36	12.31		11.45	0.818719	3
										15.77	17.84	19.42		17.6767	1.83047	3
										26.72	29.69	31.54		29.3167	2.43159	3
										32.51	34.19	37.66		34.7867	2.62633	3
										39.58	42.29	44.75		42.2067	2.58601	3
										45.48	47.31	49.23		47.34	1.87518	3
										55.79	58.69	61.88		58.7867	3.04615	3
										73.19	77.71	79.78		76.8933	3.37005	3
										78.49	80.67	81.84		80.3333	1.70019	3
										84.93	86.12	87.05		86.0333	1.06265	3
										12.97	13.95	15.43		14.1167	1.23844	3
										17.77	19.49	21.43		19.5633	1.8311	3
										30.25	33.29	34.13		32.5567	2.04131	3
										38.65	40.46	42.57		40.56	1.96191	3
										45.36	48.56	51.77		48.5633	3.205	3
										57.76	59.36	60.57		59.23	1.4095	3
										67.57	69.86	72.59		70.0067	2.51321	3
										75.58	77.73	79.68		77.6633	2.05081	3
										82.33	84.35	85.38		84.02	1.55155	3
										89.6	90.25	91.18		90.3433	0.794124	3

## Sheet: z1
DDSolver 1.0		Dissolution Data Modeling of Zero-order Model
Time Unit	min			Analyst	Selvaraj
Model	Zero-order			Date	2021-11-06
Equation	F=k0*t			Time	1899-12-31 15:33:25
Time	No.1	No.2
(min)	F(%)	F(%)	Mean	SD	RSD(%)
360	5.76667	0.748487	3.25758	3.54839	108.927
720	8.56667	2.24036	5.40352	4.47337	82.7863
1080	18.1667	1.4217	9.79418	11.8405	120.893
1440	20.5333	2.36098	11.4472	12.8498	112.253
1800	23.1167	1.606	12.3613	15.2103	123.048
2160	26.4167	1.7327	14.0747	17.4542	124.011
2520	36.45	1.46642	18.9582	24.7371	130.482
2880	44.4333	2.19003	23.3117	29.8705	128.135
3240	51.8333	1.6007	26.717	35.5198	132.948
3600	65.3467	1.415	33.3808	45.2065	135.427
Time	No.1	No.2
(min)	F(%)_Pre	F(%)_Pre	Mean	SD	RSD(%)
360	5.6213	0.243392	2.93235	3.80275	129.683
720	11.2426	0.486784	5.86469	7.60551	129.683
1080	16.8639	0.730176	8.79704	11.4083	129.683
1440	22.4852	0.973568	11.7294	15.211	129.683
1800	28.1065	1.21696	14.6617	19.0138	129.683
2160	33.7278	1.46035	17.5941	22.8165	129.683
2520	39.3491	1.70374	20.5264	26.6193	129.683
2880	44.9704	1.94714	23.4588	30.422	129.683
3240	50.5917	2.19053	26.3911	34.2248	129.683
3600	56.213	2.43392	29.3235	38.0275	129.683
Best-fit Values
Parameter	No.1	No.2	Mean	SD	RSD(%)
k0	0.0156147	0.000676089	0.0081454	0.0105632	129.683
Secondary Parameter
Parameter	No.1	No.2	Mean	SD	RSD(%)
T25	1601.05	36977.4	19289.2	25014.8	129.683
T50	3202.11	73954.8	38578.4	50029.7	129.683
T75	4803.16	110932	57867.7	75044.5	129.683
T80	5123.37	118328	61725.5	80047.5	129.683
T90	5763.79	133119	69441.2	90053.4	129.683
Goodness of Fit
Parameter	No.1	No.2
N_observed	10	10
DF	9	9
R_obs-pre	0.976995	0.10651
Rsqr	0.944241	-2.548
Rsqr_adj	0.944241	-2.548
MSE	20.5221	0.828913
MSE_root	4.53013	0.910447
Weighting	1	1
SS	184.699	7.46022
WSS	184.699	7.46022
AIC	54.1873	22.0959
MSC	2.68673	-1.46638
Predicted Data
Time	No.1	No.2
(min)	F(%)_Pre	F(%)_Pre	Mean	SD	RSD(%)
0	0	0	0	0
72	1.12426	0.0486784	0.586469	0.760551	129.683
144	2.24852	0.0973568	1.17294	1.5211	129.683
216	3.37278	0.146035	1.75941	2.28165	129.683
288	4.49704	0.194714	2.34588	3.0422	129.683
360	5.6213	0.243392	2.93235	3.80275	129.683
432	6.74556	0.29207	3.51881	4.56331	129.683
504	7.86982	0.340749	4.10528	5.32386	129.683
576	8.99408	0.389427	4.69175	6.08441	129.683
648	10.1183	0.438106	5.27822	6.84496	129.683
720	11.2426	0.486784	5.86469	7.60551	129.683
792	12.3669	0.535462	6.45116	8.36606	129.683
864	13.4911	0.584141	7.03763	9.12661	129.683
936	14.6154	0.632819	7.6241	9.88716	129.683
1008	15.7396	0.681498	8.21057	10.6477	129.683
1080	16.8639	0.730176	8.79704	11.4083	129.683
1152	17.9882	0.778855	9.38351	12.1688	129.683
1224	19.1124	0.827533	9.96997	12.9294	129.683
1296	20.2367	0.876211	10.5564	13.6899	129.683
1368	21.3609	0.92489	11.1429	14.4505	129.683
1440	22.4852	0.973568	11.7294	15.211	129.683
1512	23.6095	1.02225	12.3159	15.9716	129.683
1584	24.7337	1.07092	12.9023	16.7321	129.683
1656	25.858	1.1196	13.4888	17.4927	129.683
1728	26.9822	1.16828	14.0753	18.2532	129.683
1800	28.1065	1.21696	14.6617	19.0138	129.683
1872	29.2308	1.26564	15.2482	19.7743	129.683
1944	30.355	1.31432	15.8347	20.5349	129.683
2016	31.4793	1.363	16.4211	21.2954	129.683
2088	32.6035	1.41167	17.0076	22.056	129.683
2160	33.7278	1.46035	17.5941	22.8165	129.683
2232	34.8521	1.50903	18.1805	23.5771	129.683
2304	35.9763	1.55771	18.767	24.3376	129.683
2376	37.1006	1.60639	19.3535	25.0982	129.683
2448	38.2248	1.65507	19.9399	25.8587	129.683
2520	39.3491	1.70374	20.5264	26.6193	129.683
2592	40.4734	1.75242	21.1129	27.3798	129.683
2664	41.5976	1.8011	21.6994	28.1404	129.683
2736	42.7219	1.84978	22.2858	28.9009	129.683
2808	43.8461	1.89846	22.8723	29.6615	129.683
2880	44.9704	1.94714	23.4588	30.422	129.683
2952	46.0946	1.99581	24.0452	31.1826	129.683
3024	47.2189	2.04449	24.6317	31.9431	129.683
3096	48.3432	2.09317	25.2182	32.7037	129.683
3168	49.4674	2.14185	25.8046	33.4642	129.683
3240	50.5917	2.19053	26.3911	34.2248	129.683
3312	51.7159	2.23921	26.9776	34.9853	129.683
3384	52.8402	2.28789	27.564	35.7459	129.683
3456	53.9645	2.33656	28.1505	36.5064	129.683
3528	55.0887	2.38524	28.737	37.267	129.683
3600	56.213	2.43392	29.3235	38.0275	129.683

## Sheet: z2
DDSolver 1.0		Dissolution Data Modeling of Zero-order Model
Time Unit	min			Analyst	Selvaraj
Model	Zero-order			Date	2021-11-06
Equation	F=k0*t			Time	1899-12-31 15:35:09
Time	No.1	No.2
(min)	F(%)	F(%)	Mean	SD	RSD(%)
360	10.3233	2.22248	6.27291	5.72817	91.3159
720	13.12	1.99502	7.55751	7.86655	104.089
1080	22.2267	2.77705	12.5019	13.753	110.007
1440	23.12	2.44624	12.7831	14.6186	114.358
1800	28.4533	1.79951	15.1264	18.8471	124.597
2160	34.09	1.63092	17.8605	22.952	128.508
2520	36.39	2.3681	19.3791	24.0571	124.14
2880	42.4267	2.107	22.2668	28.5103	128.039
3240	51.6667	3.10001	27.3833	34.3418	125.411
3600	60.4333	2.37214	31.4027	41.0555	130.739
Time	No.1	No.2
(min)	F(%)_Pre	F(%)_Pre	Mean	SD	RSD(%)
360	5.72989	0.332898	3.03139	3.81625	125.891
720	11.4598	0.665796	6.06279	7.6325	125.891
1080	17.1897	0.998695	9.09418	11.4487	125.891
1440	22.9195	1.33159	12.1256	15.265	125.891
1800	28.6494	1.66449	15.157	19.0812	125.891
2160	34.3793	1.99739	18.1884	22.8975	125.891
2520	40.1092	2.33029	21.2197	26.7137	125.891
2880	45.8391	2.66319	24.2511	30.53	125.891
3240	51.569	2.99608	27.2825	34.3462	125.891
3600	57.2989	3.32898	30.3139	38.1625	125.891
Best-fit Values
Parameter	No.1	No.2	Mean	SD	RSD(%)
k0	0.0159164	0.000924717	0.00842054	0.0106007	125.891
Secondary Parameter
Parameter	No.1	No.2	Mean	SD	RSD(%)
T25	1570.71	27035.3	14303	18006.2	125.891
T50	3141.42	54070.6	28606	36012.4	125.891
T75	4712.13	81105.9	42909	54018.5	125.891
T80	5026.28	86512.9	45769.6	57619.8	125.891
T90	5654.56	97327	51490.8	64822.2	125.891
Goodness of Fit
Parameter	No.1	No.2
N_observed	10	10
DF	9	9
R_obs-pre	0.986852	0.223012
Rsqr	0.963808	-5.43487
Rsqr_adj	0.963808	-5.43487
MSE	9.41127	1.23689
MSE_root	3.06778	1.11216
Weighting	1	1
SS	84.7015	11.132
WSS	84.7015	11.132
AIC	46.3913	26.0983
MSC	3.11893	-2.06173
Predicted Data
Time	No.1	No.2
(min)	F(%)_Pre	F(%)_Pre	Mean	SD	RSD(%)
0	0	0	0	0
72	1.14598	0.0665796	0.606279	0.76325	125.891
144	2.29195	0.133159	1.21256	1.5265	125.891
216	3.43793	0.199739	1.81884	2.28975	125.891
288	4.58391	0.266319	2.42511	3.053	125.891
360	5.72989	0.332898	3.03139	3.81625	125.891
432	6.87586	0.399478	3.63767	4.5795	125.891
504	8.02184	0.466057	4.24395	5.34275	125.891
576	9.16782	0.532637	4.85023	6.106	125.891
648	10.3138	0.599217	5.45651	6.86925	125.891
720	11.4598	0.665796	6.06279	7.6325	125.891
792	12.6058	0.732376	6.66906	8.39574	125.891
864	13.7517	0.798956	7.27534	9.15899	125.891
936	14.8977	0.865535	7.88162	9.92224	125.891
1008	16.0437	0.932115	8.4879	10.6855	125.891
1080	17.1897	0.998695	9.09418	11.4487	125.891
1152	18.3356	1.06527	9.70046	12.212	125.891
1224	19.4816	1.13185	10.3067	12.9752	125.891
1296	20.6276	1.19843	10.913	13.7385	125.891
1368	21.7736	1.26501	11.5193	14.5017	125.891
1440	22.9195	1.33159	12.1256	15.265	125.891
1512	24.0655	1.39817	12.7318	16.0282	125.891
1584	25.2115	1.46475	13.3381	16.7915	125.891
1656	26.3575	1.53133	13.9444	17.5547	125.891
1728	27.5035	1.59791	14.5507	18.318	125.891
1800	28.6494	1.66449	15.157	19.0812	125.891
1872	29.7954	1.73107	15.7632	19.8445	125.891
1944	30.9414	1.79765	16.3695	20.6077	125.891
2016	32.0874	1.86423	16.9758	21.371	125.891
2088	33.2333	1.93081	17.5821	22.1342	125.891
2160	34.3793	1.99739	18.1884	22.8975	125.891
2232	35.5253	2.06397	18.7946	23.6607	125.891
2304	36.6713	2.13055	19.4009	24.424	125.891
2376	37.8173	2.19713	20.0072	25.1872	125.891
2448	38.9632	2.26371	20.6135	25.9505	125.891
2520	40.1092	2.33029	21.2197	26.7137	125.891
2592	41.2552	2.39687	21.826	27.477	125.891
2664	42.4012	2.46345	22.4323	28.2402	125.891
2736	43.5471	2.53003	23.0386	29.0035	125.891
2808	44.6931	2.59661	23.6449	29.7667	125.891
2880	45.8391	2.66319	24.2511	30.53	125.891
2952	46.9851	2.72977	24.8574	31.2932	125.891
3024	48.1311	2.79634	25.4637	32.0565	125.891
3096	49.277	2.86292	26.07	32.8197	125.891
3168	50.423	2.9295	26.6763	33.583	125.891
3240	51.569	2.99608	27.2825	34.3462	125.891
3312	52.715	3.06266	27.8888	35.1095	125.891
3384	53.8609	3.12924	28.4951	35.8727	125.891
3456	55.0069	3.19582	29.1014	36.636	125.891
3528	56.1529	3.2624	29.7076	37.3992	125.891
3600	57.2989	3.32898	30.3139	38.1625	125.891

## Sheet: z3
DDSolver 1.0		Dissolution Data Modeling of Zero-order Model
Time Unit	min			Analyst	Selvaraj
Model	Zero-order			Date	2021-11-06
Equation	F=k0*t			Time	1899-12-31 15:35:41
Time	No.1	No.2
(min)	F(%)	F(%)	Mean	SD	RSD(%)
360	9.65667	2.08989	5.87328	5.35052	91.0994
720	11.1367	2.56487	6.85077	6.06118	88.4745
1080	24.4533	2.59801	13.5257	15.4541	114.257
1440	30.8967	2.20019	16.5484	20.2915	122.619
1800	36.7867	2.33307	19.5599	24.3624	124.553
2160	40.8733	2.69088	21.7821	26.9991	123.951
2520	49.7833	3.20338	26.4934	32.937	124.322
2880	55.2033	2.54638	28.8749	37.2341	128.95
3240	58.0933	2.9711	30.5322	38.9773	127.66
3600	73.7267	2.7616	38.2441	50.1799	131.209
Time	No.1	No.2
(min)	F(%)_Pre	F(%)_Pre	Mean	SD	RSD(%)
360	7.03446	0.38643	3.71044	4.70087	126.693
720	14.0689	0.77286	7.42089	9.40173	126.693
1080	21.1034	1.15929	11.1313	14.1026	126.693
1440	28.1378	1.54572	14.8418	18.8035	126.693
1800	35.1723	1.93215	18.5522	23.5043	126.693
2160	42.2068	2.31858	22.2627	28.2052	126.693
2520	49.2412	2.70501	25.9731	32.9061	126.693
2880	56.2757	3.09144	29.6836	37.6069	126.693
3240	63.3101	3.47787	33.394	42.3078	126.693
3600	70.3446	3.8643	37.1044	47.0087	126.693
Best-fit Values
Parameter	No.1	No.2	Mean	SD	RSD(%)
k0	0.0195402	0.00107342	0.0103068	0.013058	126.693
Secondary Parameter
Parameter	No.1	No.2	Mean	SD	RSD(%)
T25	1279.42	23290.1	12284.8	15563.9	126.693
T50	2558.83	46580.2	24569.5	31127.8	126.693
T75	3838.25	69870.3	36854.3	46691.7	126.693
T80	4094.13	74528.4	39311.2	49804.5	126.693
T90	4605.9	83844.4	44225.1	56030.1	126.693
Goodness of Fit
Parameter	No.1	No.2
N_observed	10	10
DF	9	9
R_obs-pre	0.990614	0.650347
Rsqr	0.979654	-9.59599
Rsqr_adj	0.979654	-9.59599
MSE	8.75432	1.21432
MSE_root	2.95877	1.10196
Weighting	1	1
SS	78.7889	10.9289
WSS	78.7889	10.9289
AIC	45.6677	25.9141
MSC	3.69485	-2.56048
Predicted Data
Time	No.1	No.2
(min)	F(%)_Pre	F(%)_Pre	Mean	SD	RSD(%)
0	0	0	0	0
72	1.40689	0.077286	0.742089	0.940173	126.693
144	2.81378	0.154572	1.48418	1.88035	126.693
216	4.22068	0.231858	2.22627	2.82052	126.693
288	5.62757	0.309144	2.96836	3.76069	126.693
360	7.03446	0.38643	3.71044	4.70087	126.693
432	8.44135	0.463716	4.45253	5.64104	126.693
504	9.84824	0.541002	5.19462	6.58121	126.693
576	11.2551	0.618288	5.93671	7.52139	126.693
648	12.662	0.695574	6.6788	8.46156	126.693
720	14.0689	0.77286	7.42089	9.40173	126.693
792	15.4758	0.850146	8.16298	10.3419	126.693
864	16.8827	0.927432	8.90507	11.2821	126.693
936	18.2896	1.00472	9.64716	12.2223	126.693
1008	19.6965	1.082	10.3892	13.1624	126.693
1080	21.1034	1.15929	11.1313	14.1026	126.693
1152	22.5103	1.23658	11.8734	15.0428	126.693
1224	23.9172	1.31386	12.6155	15.9829	126.693
1296	25.3241	1.39115	13.3576	16.9231	126.693
1368	26.7309	1.46843	14.0997	17.8633	126.693
1440	28.1378	1.54572	14.8418	18.8035	126.693
1512	29.5447	1.62301	15.5839	19.7436	126.693
1584	30.9516	1.70029	16.326	20.6838	126.693
1656	32.3585	1.77758	17.068	21.624	126.693
1728	33.7654	1.85486	17.8101	22.5642	126.693
1800	35.1723	1.93215	18.5522	23.5043	126.693
1872	36.5792	2.00944	19.2943	24.4445	126.693
1944	37.9861	2.08672	20.0364	25.3847	126.693
2016	39.393	2.16401	20.7785	26.3249	126.693
2088	40.7999	2.24129	21.5206	27.265	126.693
2160	42.2068	2.31858	22.2627	28.2052	126.693
2232	43.6136	2.39587	23.0048	29.1454	126.693
2304	45.0205	2.47315	23.7468	30.0855	126.693
2376	46.4274	2.55044	24.4889	31.0257	126.693
2448	47.8343	2.62772	25.231	31.9659	126.693
2520	49.2412	2.70501	25.9731	32.9061	126.693
2592	50.6481	2.7823	26.7152	33.8462	126.693
2664	52.055	2.85958	27.4573	34.7864	126.693
2736	53.4619	2.93687	28.1994	35.7266	126.693
2808	54.8688	3.01415	28.9415	36.6668	126.693
2880	56.2757	3.09144	29.6836	37.6069	126.693
2952	57.6826	3.16873	30.4256	38.5471	126.693
3024	59.0895	3.24601	31.1677	39.4873	126.693
3096	60.4963	3.3233	31.9098	40.4274	126.693
3168	61.9032	3.40059	32.6519	41.3676	126.693
3240	63.3101	3.47787	33.394	42.3078	126.693
3312	64.717	3.55516	34.1361	43.248	126.693
3384	66.1239	3.63244	34.8782	44.1881	126.693
3456	67.5308	3.70973	35.6203	45.1283	126.693
3528	68.9377	3.78702	36.3624	46.0685	126.693
3600	70.3446	3.8643	37.1044	47.0087	126.693

## Sheet: z4
DDSolver 1.0		Dissolution Data Modeling of Zero-order Model
Time Unit	min			Analyst	Selvaraj
Model	Zero-order			Date	2021-11-06
Equation	F=k0*t			Time	1899-12-31 15:36:28
Time	No.1	No.2
(min)	F(%)	F(%)	Mean	SD	RSD(%)
360	13.5633	2.20378	7.88356	8.03242	101.888
720	16.12	2.24729	9.18364	9.80949	106.815
1080	30.12	2.3537	16.2368	19.6337	120.921
1440	38.2333	1.75569	19.9945	25.7936	129.003
1800	41.76	1.36231	21.5612	28.5655	132.486
2160	50.0933	2.63428	26.3638	33.5586	127.29
2520	57.76	1.58559	29.6728	39.7213	133.864
2880	71.54	1.75308	36.6465	49.3468	134.656
3240	75.6733	1.8411	38.7572	52.2073	134.703
3600	85.0067	1.70254	43.3546	58.9049	135.868
Time	No.1	No.2
(min)	F(%)_Pre	F(%)_Pre	Mean	SD	RSD(%)
360	8.58759	0.265243	4.42642	5.88479	132.947
720	17.1752	0.530486	8.85284	11.7696	132.947
1080	25.7628	0.795728	13.2793	17.6544	132.947
1440	34.3504	1.06097	17.7057	23.5392	132.947
1800	42.938	1.32621	22.1321	29.424	132.947
2160	51.5256	1.59146	26.5585	35.3087	132.947
2520	60.1132	1.8567	30.9849	41.1935	132.947
2880	68.7007	2.12194	35.4113	47.0783	132.947
3240	77.2883	2.38719	39.8378	52.9631	132.947
3600	85.8759	2.65243	44.2642	58.8479	132.947
Best-fit Values
Parameter	No.1	No.2	Mean	SD	RSD(%)
k0	0.0238544	0.000736786	0.0122956	0.0163466	132.947
Secondary Parameter
Parameter	No.1	No.2	Mean	SD	RSD(%)
T25	1048.02	33931.2	17489.6	23251.9	132.947
T50	2096.05	67862.3	34979.2	46503.8	132.947
T75	3144.07	101794	52468.8	69755.7	132.947
T80	3353.68	108580	55966.7	74406.1	132.947
T90	3772.88	122152	62962.6	83706.8	132.947
Goodness of Fit
Parameter	No.1	No.2
N_observed	10	10
DF	9	9
R_obs-pre	0.995055	-0.444631
Rsqr	0.985247	-7.58285
Rsqr_adj	0.985247	-7.58285
MSE	8.92618	1.34601
MSE_root	2.98767	1.16018
Weighting	1	1
SS	80.3356	12.1141
WSS	80.3356	12.1141
AIC	45.8621	26.9437
MSC	4.0163	-2.34977
Predicted Data
Time	No.1	No.2
(min)	F(%)_Pre	F(%)_Pre	Mean	SD	RSD(%)
0	0	0	0	0
72	1.71752	0.0530486	0.885284	1.17696	132.947
144	3.43504	0.106097	1.77057	2.35392	132.947
216	5.15256	0.159146	2.65585	3.53087	132.947
288	6.87007	0.212194	3.54113	4.70783	132.947
360	8.58759	0.265243	4.42642	5.88479	132.947
432	10.3051	0.318291	5.3117	7.06175	132.947
504	12.0226	0.37134	6.19699	8.23871	132.947
576	13.7401	0.424389	7.08227	9.41566	132.947
648	15.4577	0.477437	7.96755	10.5926	132.947
720	17.1752	0.530486	8.85284	11.7696	132.947
792	18.8927	0.583534	9.73812	12.9465	132.947
864	20.6102	0.636583	10.6234	14.1235	132.947
936	22.3277	0.689631	11.5087	15.3005	132.947
1008	24.0453	0.74268	12.394	16.4774	132.947
1080	25.7628	0.795728	13.2793	17.6544	132.947
1152	27.4803	0.848777	14.1645	18.8313	132.947
1224	29.1978	0.901826	15.0498	20.0083	132.947
1296	30.9153	0.954874	15.9351	21.1852	132.947
1368	32.6329	1.00792	16.8204	22.3622	132.947
1440	34.3504	1.06097	17.7057	23.5392	132.947
1512	36.0679	1.11402	18.591	24.7161	132.947
1584	37.7854	1.16707	19.4762	25.8931	132.947
1656	39.5029	1.22012	20.3615	27.07	132.947
1728	41.2204	1.27317	21.2468	28.247	132.947
1800	42.938	1.32621	22.1321	29.424	132.947
1872	44.6555	1.37926	23.0174	30.6009	132.947
1944	46.373	1.43231	23.9027	31.7779	132.947
2016	48.0905	1.48536	24.7879	32.9548	132.947
2088	49.808	1.53841	25.6732	34.1318	132.947
2160	51.5256	1.59146	26.5585	35.3087	132.947
2232	53.2431	1.64451	27.4438	36.4857	132.947
2304	54.9606	1.69755	28.3291	37.6627	132.947
2376	56.6781	1.7506	29.2144	38.8396	132.947
2448	58.3956	1.80365	30.0996	40.0166	132.947
2520	60.1132	1.8567	30.9849	41.1935	132.947
2592	61.8307	1.90975	31.8702	42.3705	132.947
2664	63.5482	1.9628	32.7555	43.5474	132.947
2736	65.2657	2.01585	33.6408	44.7244	132.947
2808	66.9832	2.06889	34.5261	45.9014	132.947
2880	68.7007	2.12194	35.4113	47.0783	132.947
2952	70.4183	2.17499	36.2966	48.2553	132.947
3024	72.1358	2.22804	37.1819	49.4322	132.947
3096	73.8533	2.28109	38.0672	50.6092	132.947
3168	75.5708	2.33414	38.9525	51.7862	132.947
3240	77.2883	2.38719	39.8378	52.9631	132.947
3312	79.0059	2.44023	40.723	54.1401	132.947
3384	80.7234	2.49328	41.6083	55.317	132.947
3456	82.4409	2.54633	42.4936	56.494	132.947
3528	84.1584	2.59938	43.3789	57.6709	132.947
3600	85.8759	2.65243	44.2642	58.8479	132.947

## Sheet: z5
DDSolver 1.0		Dissolution Data Modeling of Zero-order Model
Time Unit	min			Analyst	Selvaraj
Model	Zero-order			Date	2021-11-06
Equation	F=k0*t			Time	1899-12-31 15:37:24
Time	No.1	No.2
(min)	F(%)	F(%)	Mean	SD	RSD(%)
360	11.45	0.818719	6.13436	7.51745	122.547
720	17.6767	1.83047	9.75357	11.205	114.881
1080	29.3167	2.43159	15.8741	19.0106	119.759
1440	34.7867	2.62633	18.7065	22.7408	121.566
1800	42.2067	2.58601	22.3963	28.016	125.092
2160	47.34	1.87518	24.6076	32.1485	130.645
2520	58.7867	3.04615	30.9164	39.4145	127.487
2880	76.8933	3.37005	40.1317	51.9888	129.546
3240	80.3333	1.70019	41.0168	55.602	135.559
3600	86.0333	1.06265	43.548	60.0833	137.97
Time	No.1	No.2
(min)	F(%)_Pre	F(%)_Pre	Mean	SD	RSD(%)
360	8.77652	0.313435	4.54498	5.9843	131.669
720	17.553	0.62687	9.08995	11.9686	131.669
1080	26.3296	0.940306	13.6349	17.9529	131.669
1440	35.1061	1.25374	18.1799	23.9372	131.669
1800	43.8826	1.56718	22.7249	29.9215	131.669
2160	52.6591	1.88061	27.2699	35.9058	131.669
2520	61.4356	2.19405	31.8148	41.8901	131.669
2880	70.2122	2.50748	36.3598	47.8744	131.669
3240	78.9887	2.82092	40.9048	53.8587	131.669
3600	87.7652	3.13435	45.4498	59.843	131.669
Best-fit Values
Parameter	No.1	No.2	Mean	SD	RSD(%)
k0	0.0243792	0.000870653	0.0126249	0.0166231	131.669
Secondary Parameter
Parameter	No.1	No.2	Mean	SD	RSD(%)
T25	1025.46	28714.1	14869.8	19578.8	131.669
T50	2050.93	57428.1	29739.5	39157.6	131.669
T75	3076.39	86142.2	44609.3	58736.4	131.669
T80	3281.48	91885	47583.3	62652.2	131.669
T90	3691.67	103371	53531.2	70483.7	131.669
Goodness of Fit
Parameter	No.1	No.2
N_observed	10	10
DF	9	9
R_obs-pre	0.991839	0.145177
Rsqr	0.98341	-1.26596
Rsqr_adj	0.98341	-1.26596
MSE	11.528	1.54089
MSE_root	3.39529	1.24133
Weighting	1	1
SS	103.752	13.868
WSS	103.752	13.868
AIC	48.42	28.2959
MSC	3.89896	-1.018
Predicted Data
Time	No.1	No.2
(min)	F(%)_Pre	F(%)_Pre	Mean	SD	RSD(%)
0	0	0	0	0
72	1.7553	0.062687	0.908995	1.19686	131.669
144	3.51061	0.125374	1.81799	2.39372	131.669
216	5.26591	0.188061	2.72699	3.59058	131.669
288	7.02122	0.250748	3.63598	4.78744	131.669
360	8.77652	0.313435	4.54498	5.9843	131.669
432	10.5318	0.376122	5.45397	7.18117	131.669
504	12.2871	0.438809	6.36297	8.37803	131.669
576	14.0424	0.501496	7.27196	9.57489	131.669
648	15.7977	0.564183	8.18096	10.7717	131.669
720	17.553	0.62687	9.08995	11.9686	131.669
792	19.3083	0.689557	9.99895	13.1655	131.669
864	21.0636	0.752245	10.9079	14.3623	131.669
936	22.819	0.814932	11.8169	15.5592	131.669
1008	24.5743	0.877619	12.7259	16.7561	131.669
1080	26.3296	0.940306	13.6349	17.9529	131.669
1152	28.0849	1.00299	14.5439	19.1498	131.669
1224	29.8402	1.06568	15.4529	20.3466	131.669
1296	31.5955	1.12837	16.3619	21.5435	131.669
1368	33.3508	1.19105	17.2709	22.7404	131.669
1440	35.1061	1.25374	18.1799	23.9372	131.669
1512	36.8614	1.31643	19.0889	25.1341	131.669
1584	38.6167	1.37911	19.9979	26.3309	131.669
1656	40.372	1.4418	20.9069	27.5278	131.669
1728	42.1273	1.50449	21.8159	28.7247	131.669
1800	43.8826	1.56718	22.7249	29.9215	131.669
1872	45.6379	1.62986	23.6339	31.1184	131.669
1944	47.3932	1.69255	24.5429	32.3152	131.669
2016	49.1485	1.75524	25.4519	33.5121	131.669
2088	50.9038	1.81792	26.3609	34.709	131.669
2160	52.6591	1.88061	27.2699	35.9058	131.669
2232	54.4144	1.9433	28.1789	37.1027	131.669
2304	56.1697	2.00599	29.0879	38.2995	131.669
2376	57.925	2.06867	29.9969	39.4964	131.669
2448	59.6803	2.13136	30.9058	40.6933	131.669
2520	61.4356	2.19405	31.8148	41.8901	131.669
2592	63.1909	2.25673	32.7238	43.087	131.669
2664	64.9462	2.31942	33.6328	44.2839	131.669
2736	66.7015	2.38211	34.5418	45.4807	131.669
2808	68.4569	2.44479	35.4508	46.6776	131.669
2880	70.2122	2.50748	36.3598	47.8744	131.669
2952	71.9675	2.57017	37.2688	49.0713	131.669
3024	73.7228	2.63286	38.1778	50.2682	131.669
3096	75.4781	2.69554	39.0868	51.465	131.669
3168	77.2334	2.75823	39.9958	52.6619	131.669
3240	78.9887	2.82092	40.9048	53.8587	131.669
3312	80.744	2.8836	41.8138	55.0556	131.669
3384	82.4993	2.94629	42.7228	56.2525	131.669
3456	84.2546	3.00898	43.6318	57.4493	131.669
3528	86.0099	3.07167	44.5408	58.6462	131.669
3600	87.7652	3.13435	45.4498	59.843	131.669

## Sheet: z6
DDSolver 1.0		Dissolution Data Modeling of Zero-order Model
Time Unit	min			Analyst	Selvaraj
Model	Zero-order			Date	2021-11-06
Equation	F=k0*t			Time	1899-12-31 15:39:22
Time	No.1	No.2
(min)	F(%)	F(%)	Mean	SD	RSD(%)
360	14.1167	1.23844	7.67755	9.10628	118.609
720	19.5633	1.8311	10.6972	12.5386	117.213
1080	32.5567	2.04131	17.299	21.5776	124.733
1440	40.56	1.96191	21.261	27.293	128.371
1800	48.5633	3.205	25.8842	32.0732	123.91
2160	59.23	1.4095	30.3198	40.8853	134.847
2520	70.0067	2.51321	36.2599	47.7251	131.619
2880	77.6633	2.05081	39.8571	53.4661	134.145
3240	84.02	1.55155	42.7858	58.314	136.293
3600	90.3433	0.794124	45.5687	63.3209	138.957
Time	No.1	No.2
(min)	F(%)_Pre	F(%)_Pre	Mean	SD	RSD(%)
360	9.56446	0.257814	4.91114	6.58079	133.997
720	19.1289	0.515628	9.82227	13.1616	133.997
1080	28.6934	0.773442	14.7334	19.7424	133.997
1440	38.2578	1.03126	19.6445	26.3232	133.997
1800	47.8223	1.28907	24.5557	32.904	133.997
2160	57.3868	1.54688	29.4668	39.4848	133.997
2520	66.9512	1.8047	34.378	46.0655	133.997
2880	76.5157	2.06251	39.2891	52.6463	133.997
3240	86.0801	2.32033	44.2002	59.2271	133.997
3600	95.6446	2.57814	49.1114	65.8079	133.997
Best-fit Values
Parameter	No.1	No.2	Mean	SD	RSD(%)
k0	0.0265679	0.00071615	0.013642	0.01828	133.997
Secondary Parameter
Parameter	No.1	No.2	Mean	SD	RSD(%)
T25	940.984	34908.9	17924.9	24018.9	133.997
T50	1881.97	69817.8	35849.9	48037.9	133.997
T75	2822.95	104727	53774.8	72056.8	133.997
T80	3011.15	111708	57359.8	76860.6	133.997
T90	3387.54	125672	64529.8	86468.2	133.997
Goodness of Fit
Parameter	No.1	No.2
N_observed	10	10
DF	9	9
R_obs-pre	0.997242	-0.16374
Rsqr	0.986472	-2.1743
Rsqr_adj	0.986472	-2.1743
MSE	9.78704	1.45903
MSE_root	3.12842	1.2079
Weighting	1	1
SS	88.0834	13.1312
WSS	88.0834	13.1312
AIC	46.7828	27.7499
MSC	4.10296	-1.35509
Predicted Data
Time	No.1	No.2
(min)	F(%)_Pre	F(%)_Pre	Mean	SD	RSD(%)
0	0	0	0	0
72	1.91289	0.0515628	0.982227	1.31616	133.997
144	3.82578	0.103126	1.96445	2.63232	133.997
216	5.73868	0.154688	2.94668	3.94848	133.997
288	7.65157	0.206251	3.92891	5.26463	133.997
360	9.56446	0.257814	4.91114	6.58079	133.997
432	11.4774	0.309377	5.89336	7.89695	133.997
504	13.3902	0.36094	6.87559	9.21311	133.997
576	15.3031	0.412502	7.85782	10.5293	133.997
648	17.216	0.464065	8.84005	11.8454	133.997
720	19.1289	0.515628	9.82227	13.1616	133.997
792	21.0418	0.567191	10.8045	14.4777	133.997
864	22.9547	0.618754	11.7867	15.7939	133.997
936	24.8676	0.670316	12.769	17.1101	133.997
1008	26.7805	0.721879	13.7512	18.4262	133.997
1080	28.6934	0.773442	14.7334	19.7424	133.997
1152	30.6063	0.825005	15.7156	21.0585	133.997
1224	32.5192	0.876568	16.6979	22.3747	133.997
1296	34.4321	0.92813	17.6801	23.6909	133.997
1368	36.3449	0.979693	18.6623	25.007	133.997
1440	38.2578	1.03126	19.6445	26.3232	133.997
1512	40.1707	1.08282	20.6268	27.6393	133.997
1584	42.0836	1.13438	21.609	28.9555	133.997
1656	43.9965	1.18594	22.5912	30.2716	133.997
1728	45.9094	1.23751	23.5735	31.5878	133.997
1800	47.8223	1.28907	24.5557	32.904	133.997
1872	49.7352	1.34063	25.5379	34.2201	133.997
1944	51.6481	1.3922	26.5201	35.5363	133.997
2016	53.561	1.44376	27.5024	36.8524	133.997
2088	55.4739	1.49532	28.4846	38.1686	133.997
2160	57.3868	1.54688	29.4668	39.4848	133.997
2232	59.2996	1.59845	30.449	40.8009	133.997
2304	61.2125	1.65001	31.4313	42.1171	133.997
2376	63.1254	1.70157	32.4135	43.4332	133.997
2448	65.0383	1.75314	33.3957	44.7494	133.997
2520	66.9512	1.8047	34.378	46.0655	133.997
2592	68.8641	1.85626	35.3602	47.3817	133.997
2664	70.777	1.90782	36.3424	48.6979	133.997
2736	72.6899	1.95939	37.3246	50.014	133.997
2808	74.6028	2.01095	38.3069	51.3302	133.997
2880	76.5157	2.06251	39.2891	52.6463	133.997
2952	78.4286	2.11407	40.2713	53.9625	133.997
3024	80.3415	2.16564	41.2535	55.2787	133.997
3096	82.2543	2.2172	42.2358	56.5948	133.997
3168	84.1672	2.26876	43.218	57.911	133.997
3240	86.0801	2.32033	44.2002	59.2271	133.997
3312	87.993	2.37189	45.1825	60.5433	133.997
3384	89.9059	2.42345	46.1647	61.8594	133.997
3456	91.8188	2.47501	47.1469	63.1756	133.997
3528	93.7317	2.52658	48.1291	64.4918	133.997
3600	95.6446	2.57814	49.1114	65.8079	133.997

## Sheet: f1
DDSolver 1.0		Dissolution Data Modeling of First-order Model
Time Unit	min			Analyst	Selvaraj
Model	First-order			Date	2021-11-06
Equation	F=100*[1-Exp(-k1*t)]			Time	1899-12-31 15:40:33
Time	No.1	No.2
(min)	F(%)	F(%)	Mean	SD	RSD(%)
360	5.76667	0.748487	3.25758	3.54839	108.927
720	8.56667	2.24036	5.40352	4.47337	82.7863
1080	18.1667	1.4217	9.79418	11.8405	120.893
1440	20.5333	2.36098	11.4472	12.8498	112.253
1800	23.1167	1.606	12.3613	15.2103	123.048
2160	26.4167	1.7327	14.0747	17.4542	124.011
2520	36.45	1.46642	18.9582	24.7371	130.482
2880	44.4333	2.19003	23.3117	29.8705	128.135
3240	51.8333	1.6007	26.717	35.5198	132.948
3600	65.3467	1.415	33.3808	45.2065	135.427
Time	No.1	No.2
(min)	F(%)_Pre	F(%)_Pre	Mean	SD	RSD(%)
360	6.89796	0.245996	3.57198	4.70365	131.682
720	13.3201	0.491387	6.90574	9.07127	131.358
1080	19.2992	0.736175	10.0177	13.1261	131.029
1440	24.866	0.98036	12.9232	16.8897	130.693
1800	30.0487	1.22394	15.6363	20.3822	130.351
2160	34.8739	1.46693	18.1704	23.6223	130.004
2520	39.3663	1.70932	20.5378	26.6275	129.651
2880	43.5488	1.95111	22.7499	29.414	129.293
3240	47.4427	2.1923	24.8175	31.9969	128.929
3600	51.0681	2.43291	26.7505	34.3903	128.559
Best-fit Values
Parameter	No.1	No.2	Mean	SD	RSD(%)
k1	0.000198539	6.84165e-06	0.00010269	0.000135551	131.999
Secondary Parameter
Parameter	No.1	No.2	Mean	SD	RSD(%)
T25	1448.99	42048.7	21748.8	28708.3	131.999
T50	3491.24	101313	52402.1	69170.4	131.999
T75	6982.47	202626	104804	138341	131.999
T80	8106.4	235241	121674	160609	131.999
T90	11597.6	336554	174076	229779	131.999
Goodness of Fit
Parameter	No.1	No.2
N_observed	10	10
DF	9	9
R_obs-pre	0.957767	0.107967
Rsqr	0.880468	-2.52235
Rsqr_adj	0.880468	-2.52235
MSE	43.9942	0.822921
MSE_root	6.63281	0.90715
Weighting	1	1
SS	395.948	7.40629
WSS	395.948	7.40629
AIC	61.8128	22.0233
MSC	1.92417	-1.45913
Predicted Data
Time	No.1	No.2
(min)	F(%)_Pre	F(%)_Pre	Mean	SD	RSD(%)
0	0	0	0	0
72	1.41931	0.0492477	0.734281	0.968783	131.936
144	2.81848	0.0984712	1.45848	1.92334	131.873
216	4.19779	0.14767	2.17273	2.86387	131.81
288	5.55753	0.196845	2.87719	3.79057	131.746
360	6.89796	0.245996	3.57198	4.70365	131.682
432	8.21937	0.295123	4.25725	5.60329	131.618
504	9.52202	0.344225	4.93312	6.48968	131.553
576	10.8062	0.393303	5.59975	7.36302	131.488
648	12.0721	0.442357	6.25724	8.22349	131.424
720	13.3201	0.491387	6.90574	9.07127	131.358
792	14.5504	0.540393	7.54538	9.90654	131.293
864	15.7632	0.589374	8.17627	10.7295	131.227
936	16.9587	0.638332	8.79854	11.5403	131.161
1008	18.1374	0.687265	9.41231	12.3391	131.095
1080	19.2992	0.736175	10.0177	13.1261	131.029
1152	20.4446	0.78506	10.6149	13.9014	130.962
1224	21.5738	0.833921	11.2039	14.6653	130.895
1296	22.6869	0.882758	11.7848	15.4179	130.828
1368	23.7842	0.931571	12.3579	16.1593	130.761
1440	24.866	0.98036	12.9232	16.8897	130.693
1512	25.9323	1.02912	13.4807	17.6092	130.625
1584	26.9836	1.07787	14.0307	18.3181	130.557
1656	28.0199	1.12658	14.5733	19.0165	130.489
1728	29.0415	1.17528	15.1084	19.7044	130.42
1800	30.0487	1.22394	15.6363	20.3822	130.351
1872	31.0415	1.27259	16.157	21.0498	130.282
1944	32.0202	1.32121	16.6707	21.7075	130.213
2016	32.9851	1.36981	17.1774	22.3554	130.144
2088	33.9362	1.41838	17.6773	22.9936	130.074
2160	34.8739	1.46693	18.1704	23.6223	130.004
2232	35.7982	1.51545	18.6568	24.2416	129.934
2304	36.7095	1.56396	19.1367	24.8516	129.864
2376	37.6077	1.61243	19.6101	25.4525	129.793
2448	38.4933	1.66089	20.0771	26.0444	129.722
2520	39.3663	1.70932	20.5378	26.6275	129.651
2592	40.2268	1.75772	20.9923	27.2018	129.58
2664	41.0752	1.80611	21.4407	27.7675	129.508
2736	41.9115	1.85446	21.883	28.3246	129.437
2808	42.736	1.9028	22.3194	28.8734	129.365
2880	43.5488	1.95111	22.7499	29.414	129.293
2952	44.35	1.9994	23.1747	29.9464	129.22
3024	45.1398	2.04766	23.5937	30.4708	129.148
3096	45.9185	2.0959	24.0072	30.9872	129.075
3168	46.686	2.14411	24.4151	31.4959	129.002
3240	47.4427	2.1923	24.8175	31.9969	128.929
3312	48.1887	2.24047	25.2146	32.4903	128.855
3384	48.9241	2.28862	25.6063	32.9762	128.782
3456	49.649	2.33674	25.9929	33.4548	128.708
3528	50.3636	2.38483	26.3742	33.9261	128.634
3600	51.0681	2.43291	26.7505	34.3903	128.559

## Sheet: f2
DDSolver 1.0		Dissolution Data Modeling of First-order Model
Time Unit	min			Analyst	Selvaraj
Model	First-order			Date	2021-11-06
Equation	F=100*[1-Exp(-k1*t)]			Time	1899-12-31 15:41:07
Time	No.1	No.2
(min)	F(%)	F(%)	Mean	SD	RSD(%)
360	10.3233	2.22248	6.27291	5.72817	91.3159
720	13.12	1.99502	7.55751	7.86655	104.089
1080	22.2267	2.77705	12.5019	13.753	110.007
1440	23.12	2.44624	12.7831	14.6186	114.358
1800	28.4533	1.79951	15.1264	18.8471	124.597
2160	34.09	1.63092	17.8605	22.952	128.508
2520	36.39	2.3681	19.3791	24.0571	124.14
2880	42.4267	2.107	22.2668	28.5103	128.039
3240	51.6667	3.10001	27.3833	34.3418	125.411
3600	60.4333	2.37214	31.4027	41.0555	130.739
Time	No.1	No.2
(min)	F(%)_Pre	F(%)_Pre	Mean	SD	RSD(%)
360	7.2111	0.337405	3.77425	4.86044	128.779
720	13.9022	0.673671	7.28794	9.35399	128.349
1080	20.1108	1.0088	10.5598	13.5072	127.911
1440	25.8717	1.3428	13.6072	17.3445	127.465
1800	31.2172	1.67568	16.4464	20.889	127.012
2160	36.1772	2.00743	19.0923	24.1617	126.552
2520	40.7795	2.33806	21.5588	27.1822	126.084
2880	45.0499	2.66758	23.8588	29.9689	125.609
3240	49.0124	2.99598	26.0042	32.5386	125.128
3600	52.6892	3.32328	28.0062	34.907	124.64
Best-fit Values
Parameter	No.1	No.2	Mean	SD	RSD(%)
k1	0.000207898	9.3882e-06	0.000108643	0.000140367	129.201
Secondary Parameter
Parameter	No.1	No.2	Mean	SD	RSD(%)
T25	1383.77	30642.9	16013.3	20689.4	129.201
T50	3334.08	73831.7	38582.9	49849.4	129.201
T75	6668.15	147663	77165.8	99698.7	129.201
T80	7741.49	171432	89586.7	115747	129.201
T90	11075.6	245264	128170	165596	129.201
Goodness of Fit
Parameter	No.1	No.2
N_observed	10	10
DF	9	9
R_obs-pre	0.972691	0.22168
Rsqr	0.945518	-5.37676
Rsqr_adj	0.945518	-5.37676
MSE	14.1674	1.22572
MSE_root	3.76397	1.10712
Weighting	1	1
SS	127.507	11.0315
WSS	127.507	11.0315
AIC	50.4817	26.0076
MSC	2.70989	-2.05266
Predicted Data
Time	No.1	No.2
(min)	F(%)_Pre	F(%)_Pre	Mean	SD	RSD(%)
0	0	0	0	0
72	1.48572	0.0675722	0.776644	1.00278	129.117
144	2.94936	0.135099	1.54223	1.98998	129.033
216	4.39126	0.20258	2.29692	2.96184	128.949
288	5.81173	0.270015	3.04087	3.91859	128.864
360	7.2111	0.337405	3.77425	4.86044	128.779
432	8.58968	0.404749	4.49722	5.78762	128.693
504	9.94778	0.472048	5.20991	6.70035	128.608
576	11.2857	0.539301	5.9125	7.59885	128.522
648	12.6037	0.606509	6.60513	8.48333	128.435
720	13.9022	0.673671	7.28794	9.35399	128.349
792	15.1814	0.740788	7.96108	10.211	128.262
864	16.4415	0.80786	8.6247	11.0547	128.175
936	17.683	0.874886	9.27893	11.8851	128.087
1008	18.906	0.941867	9.92392	12.7025	127.999
1080	20.1108	1.0088	10.5598	13.5072	127.911
1152	21.2977	1.07569	11.1867	14.2991	127.823
1224	22.467	1.14254	11.8048	15.0787	127.734
1296	23.6189	1.20934	12.4141	15.846	127.645
1368	24.7537	1.27609	13.0149	16.6012	127.555
1440	25.8717	1.3428	13.6072	17.3445	127.465
1512	26.973	1.40947	14.1913	18.0762	127.375
1584	28.058	1.47609	14.767	18.7963	127.285
1656	29.1269	1.54266	15.3348	19.505	127.194
1728	30.1798	1.60919	15.8945	20.2025	127.104
1800	31.2172	1.67568	16.4464	20.889	127.012
1872	32.2391	1.74212	16.9906	21.5646	126.921
1944	33.2458	1.80851	17.5272	22.2295	126.829
2016	34.2376	1.87486	18.0562	22.8839	126.737
2088	35.2146	1.94117	18.5779	23.5279	126.645
2160	36.1772	2.00743	19.0923	24.1617	126.552
2232	37.1254	2.07365	19.5995	24.7853	126.459
2304	38.0595	2.13982	20.0997	25.3991	126.366
2376	38.9798	2.20594	20.5929	26.003	126.272
2448	39.8864	2.27202	21.0792	26.5974	126.178
2520	40.7795	2.33806	21.5588	27.1822	126.084
2592	41.6593	2.40405	22.0317	27.7577	125.99
2664	42.5261	2.47	22.4981	28.324	125.895
2736	43.38	2.5359	22.958	28.8811	125.8
2808	44.2212	2.60176	23.4115	29.4294	125.705
2880	45.0499	2.66758	23.8588	29.9689	125.609
2952	45.8663	2.73335	24.2998	30.4996	125.514
3024	46.6706	2.79907	24.7348	31.0219	125.418
3096	47.4629	2.86475	25.1638	31.5357	125.321
3168	48.2435	2.93039	25.5869	32.0412	125.225
3240	49.0124	2.99598	26.0042	32.5386	125.128
3312	49.77	3.06153	26.4158	33.0279	125.031
3384	50.5163	3.12703	26.8216	33.5092	124.934
3456	51.2514	3.19249	27.222	33.9828	124.836
3528	51.9757	3.25791	27.6168	34.4487	124.738
3600	52.6892	3.32328	28.0062	34.907	124.64

## Sheet: f3
DDSolver 1.0		Dissolution Data Modeling of First-order Model
Time Unit	min			Analyst	Selvaraj
Model	First-order			Date	2021-11-06
Equation	F=100*[1-Exp(-k1*t)]			Time	1899-12-31 15:41:32
Time	No.1	No.2
(min)	F(%)	F(%)	Mean	SD	RSD(%)
360	9.65667	2.08989	5.87328	5.35052	91.0994
720	11.1367	2.56487	6.85077	6.06118	88.4745
1080	24.4533	2.59801	13.5257	15.4541	114.257
1440	30.8967	2.20019	16.5484	20.2915	122.619
1800	36.7867	2.33307	19.5599	24.3624	124.553
2160	40.8733	2.69088	21.7821	26.9991	123.951
2520	49.7833	3.20338	26.4934	32.937	124.322
2880	55.2033	2.54638	28.8749	37.2341	128.95
3240	58.0933	2.9711	30.5322	38.9773	127.66
3600	73.7267	2.7616	38.2441	50.1799	131.209
Time	No.1	No.2
(min)	F(%)_Pre	F(%)_Pre	Mean	SD	RSD(%)
360	9.42413	0.392576	4.90835	6.38627	130.11
720	17.9601	0.783611	9.37186	12.1456	129.597
1080	25.6917	1.17311	13.4324	17.3372	129.07
1440	32.6946	1.56108	17.1278	22.0147	128.532
1800	39.0375	1.94753	20.4925	26.2266	127.981
2160	44.7827	2.33246	23.5576	30.0169	127.419
2520	49.9865	2.71588	26.3512	33.4253	126.846
2880	54.6998	3.09779	28.8988	36.4881	126.262
3240	58.9689	3.47821	31.2236	39.2379	125.667
3600	62.8358	3.85713	33.3464	41.7042	125.063
Best-fit Values
Parameter	No.1	No.2	Mean	SD	RSD(%)
k1	0.000274951	1.09264e-05	0.000142939	0.000186694	130.611
Secondary Parameter
Parameter	No.1	No.2	Mean	SD	RSD(%)
T25	1046.3	26329.2	13687.7	17877.7	130.611
T50	2520.99	63438.1	32979.5	43074.9	130.611
T75	5041.97	126876	65959.1	86149.8	130.611
T80	5853.55	147299	76576.1	100017	130.611
T90	8374.53	210737	109556	143092	130.611
Goodness of Fit
Parameter	No.1	No.2
N_observed	10	10
DF	9	9
R_obs-pre	0.982396	0.650879
Rsqr	0.950572	-9.4407
Rsqr_adj	0.950572	-9.4407
MSE	21.2669	1.19652
MSE_root	4.61161	1.09386
Weighting	1	1
SS	191.402	10.7687
WSS	191.402	10.7687
AIC	54.5438	25.7664
MSC	2.80724	-2.54571
Predicted Data
Time	No.1	No.2
(min)	F(%)_Pre	F(%)_Pre	Mean	SD	RSD(%)
0	0	0	0	0
72	1.96018	0.0786388	1.01941	1.33045	130.512
144	3.88194	0.157216	2.01958	2.63378	130.412
216	5.76602	0.235731	3.00088	3.91051	130.312
288	7.61318	0.314184	3.96368	5.16117	130.211
360	9.42413	0.392576	4.90835	6.38627	130.11
432	11.1996	0.470906	5.83524	7.58632	130.009
504	12.9402	0.549175	6.7447	8.7618	129.906
576	14.6468	0.627382	7.63707	9.91319	129.804
648	16.3198	0.705527	8.51268	11.041	129.7
720	17.9601	0.783611	9.37186	12.1456	129.597
792	19.5682	0.861634	10.2149	13.2276	129.492
864	21.1449	0.939595	11.0422	14.2873	129.388
936	22.6906	1.0175	11.854	15.3252	129.282
1008	24.206	1.09533	12.6506	16.3417	129.177
1080	25.6917	1.17311	13.4324	17.3372	129.07
1152	27.1482	1.25083	14.1995	18.3122	128.964
1224	28.5763	1.32848	14.9524	19.2671	128.856
1296	29.9763	1.40608	15.6912	20.2022	128.749
1368	31.3489	1.48361	16.4162	21.1179	128.64
1440	32.6946	1.56108	17.1278	22.0147	128.532
1512	34.0139	1.63849	17.8262	22.8929	128.423
1584	35.3073	1.71584	18.5116	23.7528	128.313
1656	36.5754	1.79313	19.1843	24.5948	128.203
1728	37.8187	1.87036	19.8445	25.4193	128.092
1800	39.0375	1.94753	20.4925	26.2266	127.981
1872	40.2325	2.02464	21.1286	27.017	127.87
1944	41.404	2.10168	21.7529	27.791	127.758
2016	42.5526	2.17867	22.3657	28.5487	127.645
2088	43.6787	2.2556	22.9672	29.2906	127.532
2160	44.7827	2.33246	23.5576	30.0169	127.419
2232	45.8651	2.40927	24.1372	30.7279	127.305
2304	46.9262	2.48601	24.7061	31.424	127.191
2376	47.9665	2.56269	25.2646	32.1054	127.076
2448	48.9865	2.63932	25.8129	32.7724	126.961
2520	49.9865	2.71588	26.3512	33.4253	126.846
2592	50.9668	2.79238	26.8796	34.0645	126.73
2664	51.928	2.86883	27.3984	34.69	126.613
2736	52.8702	2.94521	27.9077	35.3023	126.497
2808	53.7941	3.02153	28.4078	35.9016	126.379
2880	54.6998	3.09779	28.8988	36.4881	126.262
2952	55.5878	3.174	29.3809	37.0621	126.144
3024	56.4583	3.25014	29.8542	37.6239	126.025
3096	57.3118	3.32622	30.319	38.1736	125.906
3168	58.1486	3.40225	30.7754	38.7115	125.787
3240	58.9689	3.47821	31.2236	39.2379	125.667
3312	59.7732	3.55411	31.6637	39.7529	125.547
3384	60.5617	3.62996	32.0959	40.2569	125.427
3456	61.3348	3.70574	32.5203	40.7499	125.306
3528	62.0927	3.78147	32.9371	41.2323	125.185
3600	62.8358	3.85713	33.3464	41.7042	125.063

[truncated: 23 more sheets: f4, f5, f6, H1, H2, H3, H4, H5, H6, KP1, KP2, KP3, KP4, KP5, KP6, HC1, HC2, HC3, HC4, HC5 …]
